# Supplementary material
Source: Springer Nature journal article supplement (https://www.springermedizin.de/resource/supplementary/13256_2014_2915_MOESM2_ESM.pdf/9650814)

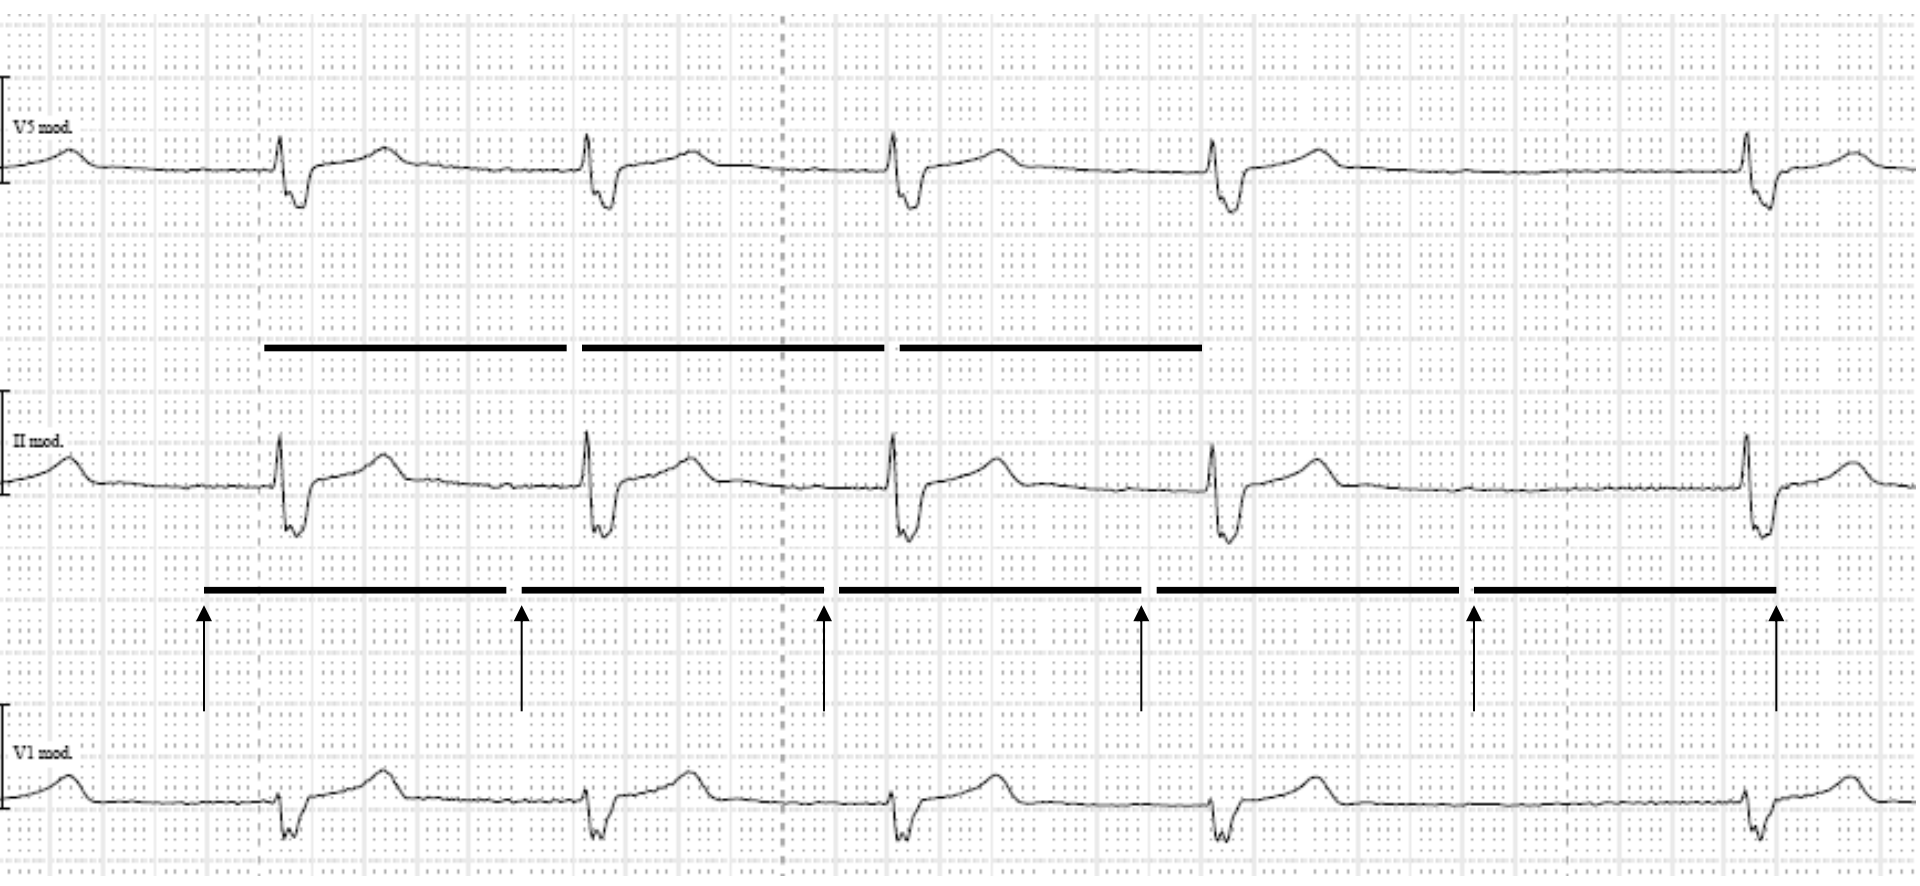

Supplement: MOESM2 [file 9650814]
